# Supplementary material for: Oncologic Benefits of Neoadjuvant Treatment versus Upfront Surgery in Borderline Resectable Pancreatic Cancer: A Systematic Review and Meta-Analysis
Source: MDPI journal article supplement (doi:10.3390/cancers14184360), 2022-09-07

**Supplementary Figure S1. Risk of bias summary using the Cochrane Collaboration's tool for the randomized controlled trial (A) and the Risk of Bias Assessment Tool for Nonrandomized Studies (RoBANS) (B).**

**(A)**

|                 | Random sequence generation (selection bias) | Allocation concealment (selection bias) | Blinding of participants and personnel (performance bias) | Blinding of outcome assessment (detection bias) | Incomplete outcome data (attrition bias) | Selective reporting (reporting bias) | Other bias |
|-----------------|---------------------------------------------|-----------------------------------------|-----------------------------------------------------------|-------------------------------------------------|------------------------------------------|--------------------------------------|------------|
| Jang 2018       | +                                           | +                                       | +                                                         | +                                               | +                                        | +                                    | +          |
| Versteijne 2020 | +                                           | +                                       | +                                                         | +                                               | +                                        | +                                    | +          |

|                 | Selection of participants | Confounding variables | Intervention measurement | Blinding of outcome assessment | Incomplete outcome data | Selective outcome reporting |
|-----------------|---------------------------|-----------------------|--------------------------|--------------------------------|-------------------------|-----------------------------|
| Chaudhari 2021  | +                         | ?                     | +                        | +                              | +                       | +                           |
| Cho 2013        | -                         |                       | +                        | +                              | +                       | +                           |
| Chun 2010       | -                         | ?                     | +                        | +                              | +                       | +                           |
| Fujii-A 2017    | +                         | -                     | +                        | +                              | +                       | +                           |
| Fujii-PV 2017   | +                         | -                     | +                        | +                              | +                       | +                           |
| Hirono 2016     | -                         | +                     | +                        | +                              | +                       | +                           |
| Ielpo 2017      | +                         | -                     | +                        | +                              | +                       | +                           |
| Inoue 2021      | +                         | +                     | +                        | +                              | +                       | +                           |
| Jang 2018       |                           |                       |                          |                                |                         |                             |
| Kimura-A 2021   | +                         | +                     | +                        | +                              | +                       | +                           |
| Kimura-PV 2021  | +                         | +                     | +                        | +                              | +                       | +                           |
| Kurahara 2019   | +                         | +                     | +                        | +                              | +                       | +                           |
| Lee 2018        | -                         | ?                     | +                        | +                              | +                       | +                           |
| Masui 2016      | +                         | +                     | +                        | +                              | +                       | +                           |
| Miyasaka 2019   | +                         | +                     | +                        | +                              | +                       | +                           |
| Murakami 2017   | +                         | +                     | +                        | +                              | +                       | +                           |
| Nagakawa 2019   | +                         | +                     | +                        | +                              | +                       | +                           |
| Ren 2021        | -                         | +                     | +                        | +                              | +                       | +                           |
| Sho 2015        | -                         | -                     | +                        | +                              | +                       | +                           |
| Terlizzi 2021   | +                         | +                     | +                        | +                              | +                       | +                           |
| Versteijne 2020 |                           |                       |                          |                                |                         |                             |

(B)

**Supplementary Figure S2. Overall survival of NAT versus UFS according to NAT protocol (chemotherapy only and chemoradiotherapy).**

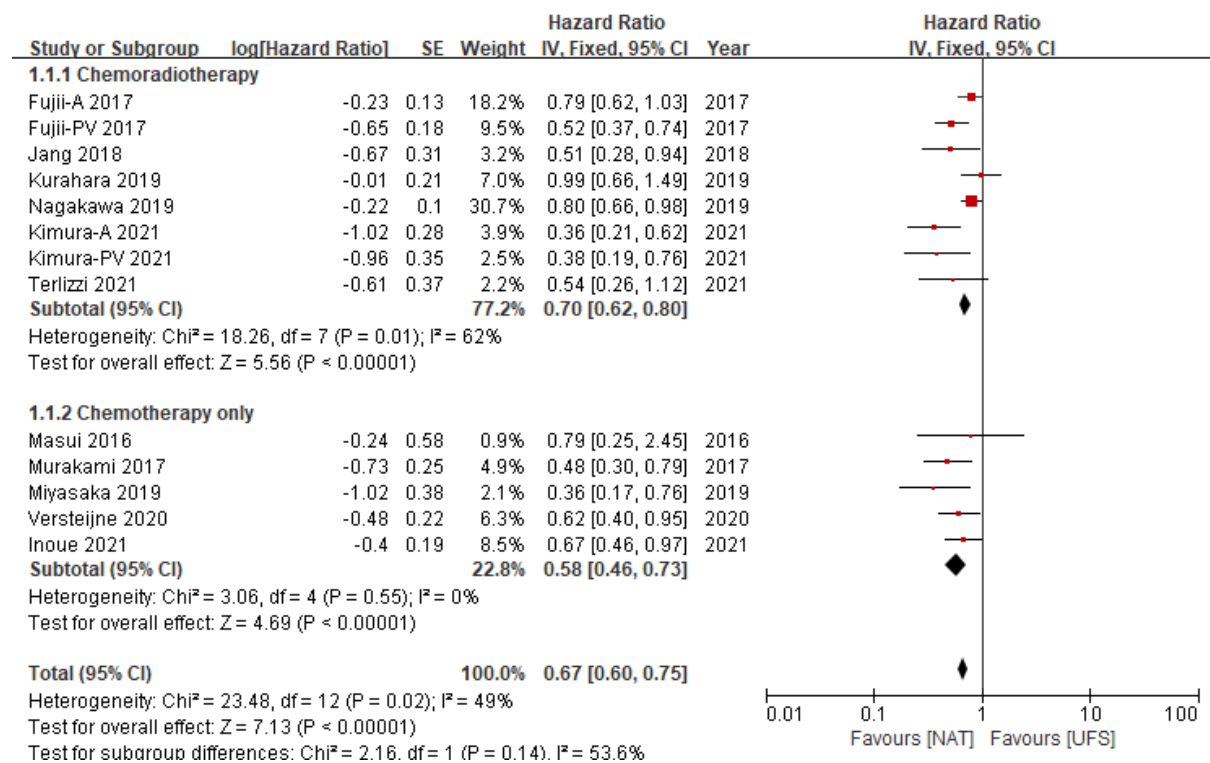

**Supplementary Figure S3. Funnel plots for publication bias in comparison of survival outcome in ITT analysis.**

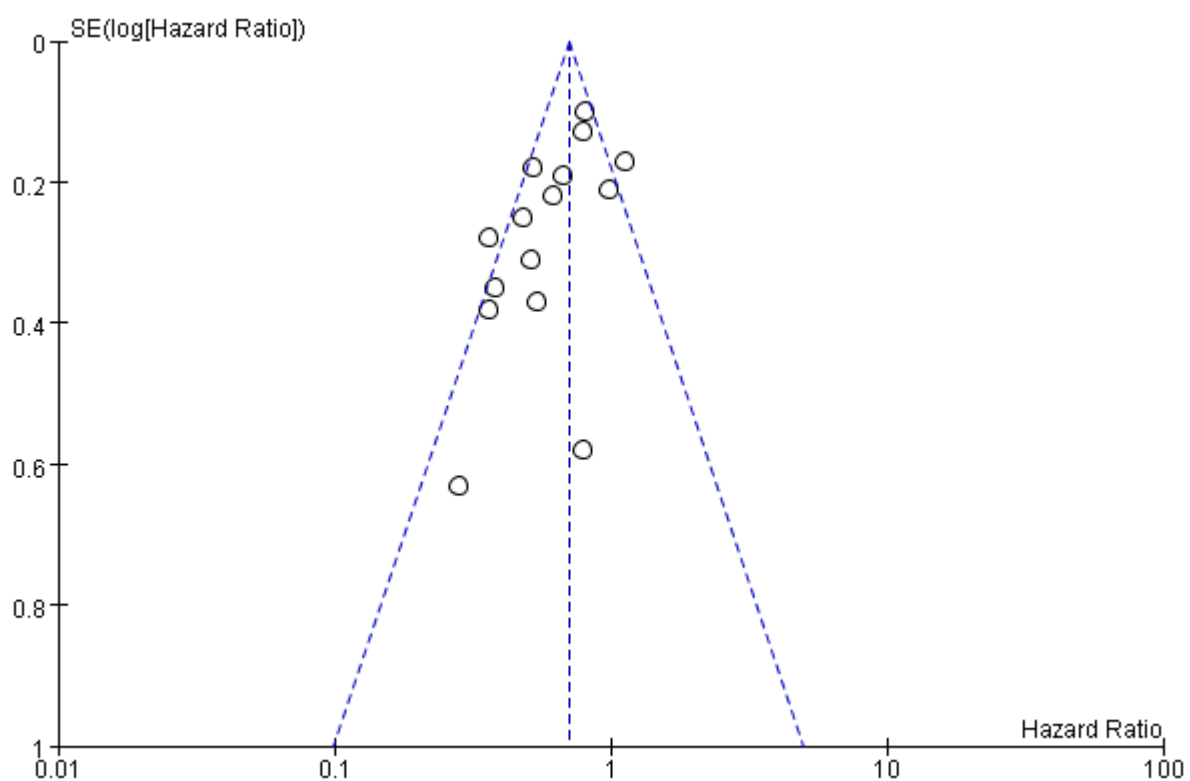

Supplement: s1 [file s1]
